# Supplementary material for: Tracing the mobility of a Late Epigravettian (~ 13 ka) male infant from Grotte di Pradis (Northeastern Italian Prealps) at high-temporal resolution
Source: Springer Nature journal article supplement (doi:10.1038/s41598-022-12193-6), 2022-05-16
Supplement: MOESM2 [file 41598_2022_12193_MOESM2_ESM.pdf]

Supplementary information for:

## **Tracing the mobility of a Late Epigravettian (~13 ka) male infant from Grotte di Pradis (Northeastern Italian Prealps) at high-temporal resolution**

Federico Lugli, Alessia Nava, Rita Sorrentino, Antonino Vazzana, Eugenio Bortolini, Gregorio Oxilia, Silvestrini Sara, Nicola Nannini, Luca Bondioli, Helen Fewlass, Sahra Talamo, Edouard Bard, Lucia Mancini, Wolfgang Müller, Matteo Romandini, Stefano Benazzi

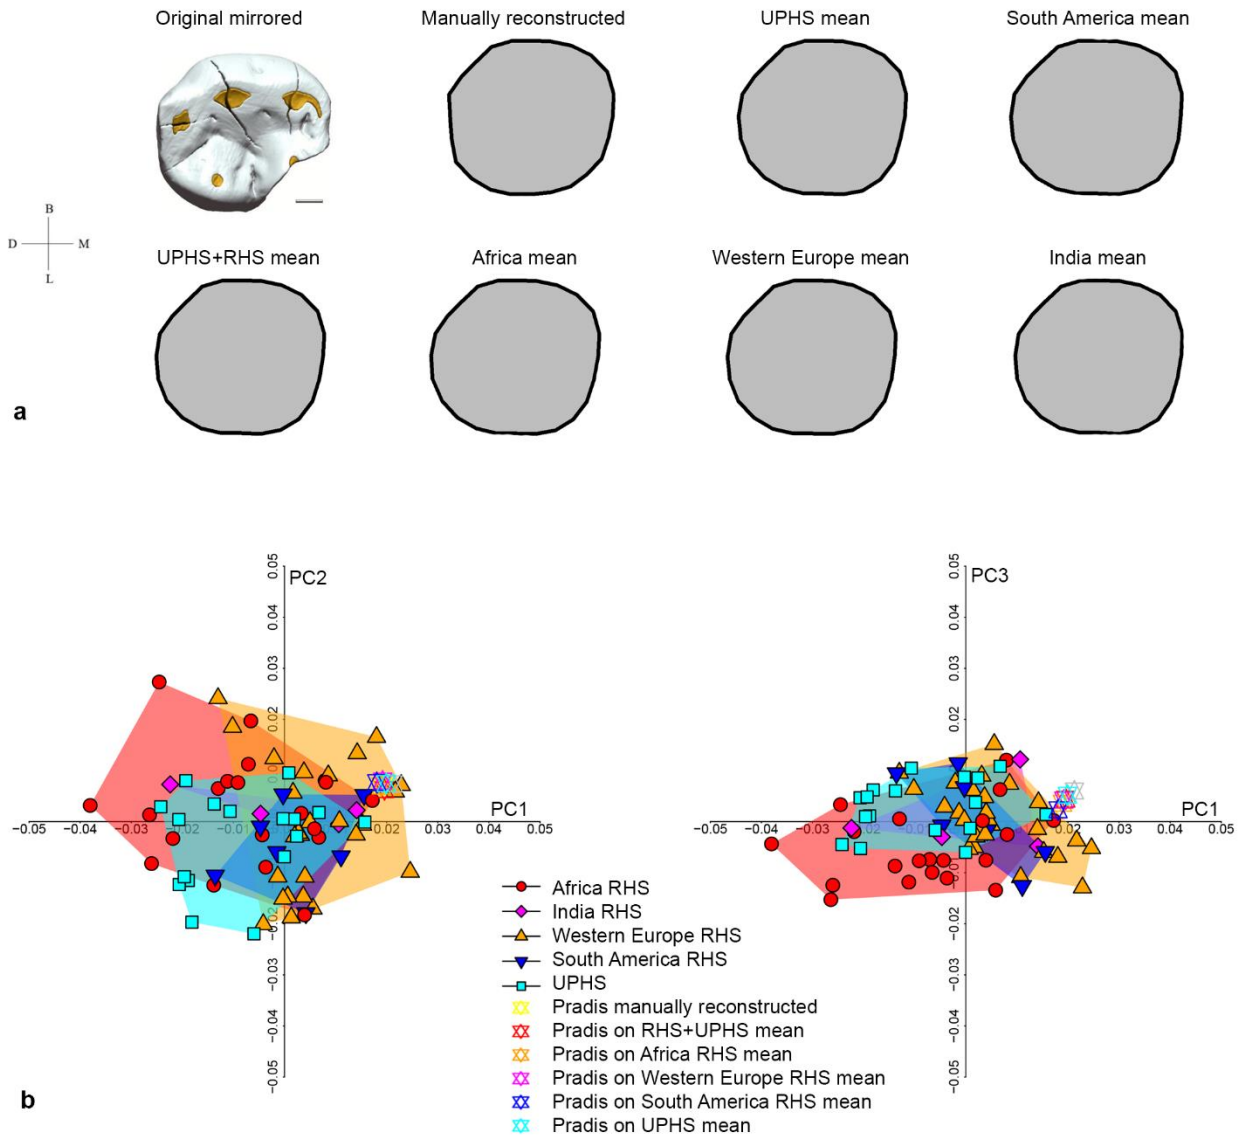

**Supplementary Fig. S1.** Pradis dm2 mirrored, manually reconstructed, and geometric morphometric reconstructed based on Upper Paleolithic *H. sapiens* (UPHS) mean, African recent *H. sapiens* (RHS) mean, Indian RHS mean, Western European RHS mean, South American RHS mean, and RHS - UPHS pooled groups (a). Principal component analysis (PCA) plot of PC1 vs. PC2 (on the left) and PC1 vs. PC3 (on the right) of the dm2 comparative sample in which Pradis reconstructions are projected. The stars represent Pradis right dm2 mirrored and reconstructed based on UPHS mean, African RHS mean, Indian RHS mean, Western European RHS mean, South American RHS mean, and RHS - UPHS pooled groups (b).

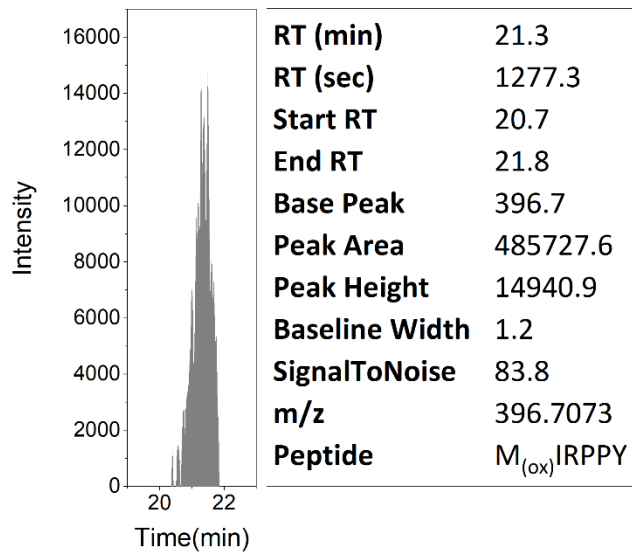

**Supplementary Figure S2.** LC-MS ion chromatograms of peptide M(ox)IRPPY (human AMELY) at m/z 396.7073 ( $[M + 2 H]^+2$ ).

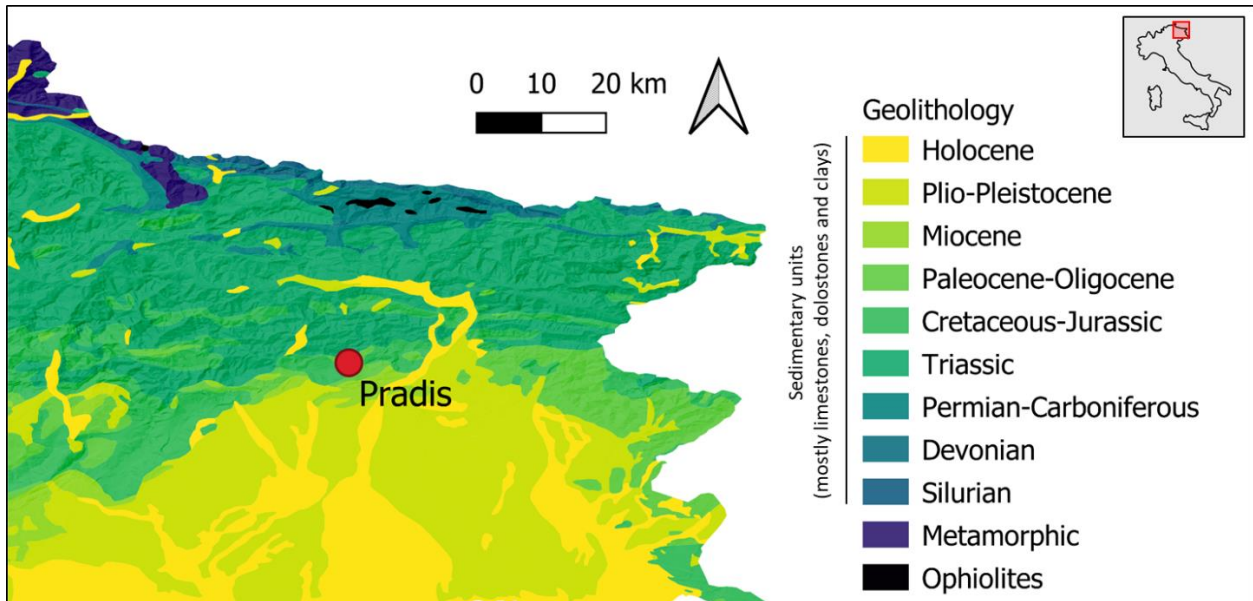

**Supplementary Fig. S3.** Geological map of Northeastern Italy, built in QGIS 3.18. This map is based on the geolithological map of Italy available at the Geoportale Nazionale ([http://wms.pcn.minambiente.it/ogc?map=/ms\\_ogc/wfs/Carta\\_geolitologica.map](http://wms.pcn.minambiente.it/ogc?map=/ms_ogc/wfs/Carta_geolitologica.map)).

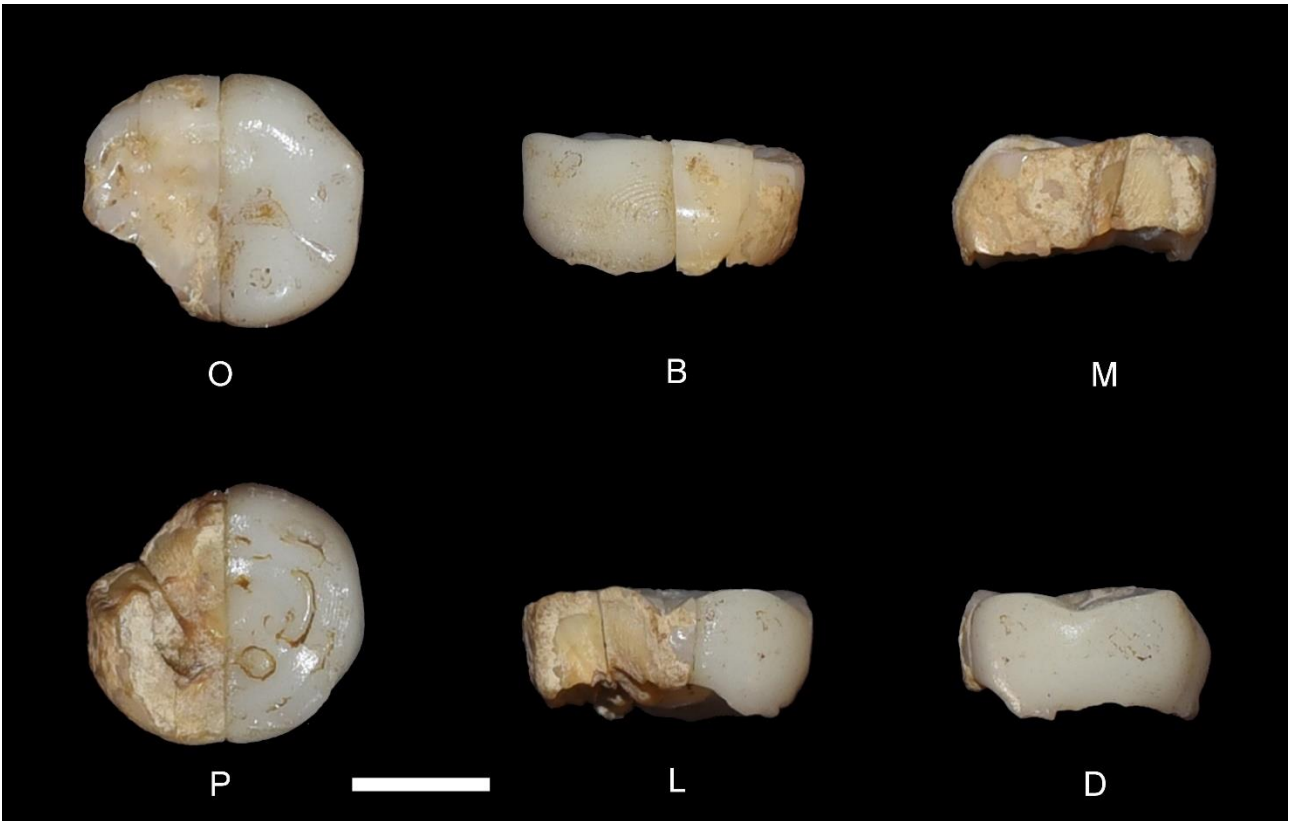

**Supplementary Fig. S4.** Photographic record of Pradis 1 tooth after the restoration protocol; scale bar is 5 mm; O = occlusal; B = buccal; M = mesial; L = lingual; D = distal; P = periapical.

**Supplementary Table S1.** Information on identified peptides within the chromatogram, using ICIS algorithm of Xcalibur.

| RT (min) | RT (sec) | Start RT | End RT | Base Peak | Peak Area | Peak Height | Baseline Width | SignalToNoise | Peptide                  | m/z      |
|----------|----------|----------|--------|-----------|-----------|-------------|----------------|---------------|--------------------------|----------|
| 21.8     | 1305.5   | 21.4     | 22.2   | 440.2     | 918747.1  | 33389.2     | 0.8            | 73.1          | SM <sub>(ox)</sub> IRPPY | 440.2233 |
| 30.9     | 1856.5   | 30.3     | 31.3   | 540.3     | 1055280.0 | 37411.1     | 1.1            | 64.3          | SIRPPYPSY                | 540.2796 |

**Supplementary Table S2.** Pretreatment and <sup>14</sup>C dating information for the Pradis 1 tooth. The <sup>14</sup>C dates were calibrated in OxCal v4.4 against the IntCal20 dataset (Bronk Ramsey, 2009; Reimer et al 2020).

| Sample ID | Tooth sampled (mg) | Collagen yield (%) | C%   | N%   | C:N | δ <sup>13</sup> C (‰) | δ <sup>15</sup> N (‰) | <sup>14</sup> C method    | AMS lab number | <sup>14</sup> C age (BP) | Error (y) | 68.3% Calibrated range (cal BP) | 95.4% Calibrated range (cal BP) |
|-----------|--------------------|--------------------|------|------|-----|-----------------------|-----------------------|---------------------------|----------------|--------------------------|-----------|---------------------------------|---------------------------------|
| Pradis 1  | 102.2              | 5.9                | 39.2 | 14.6 | 3.1 | -18.5                 | 11.7                  | Graphite                  | MAMS-38332     | 11046                    | 32        |                                 |                                 |
|           |                    |                    |      |      |     |                       |                       | CO <sub>2</sub>           | AIX-12033      | 11217                    | 124       |                                 |                                 |
|           |                    |                    |      |      |     |                       |                       | Weighted mean (R_Combine) |                | 11057                    | 31        | 13068-12929                     | 13088-12897                     |
