# Supplementary material for: Tracing the mobility of a Late Epigravettian (~ 13 ka) male infant from Grotte di Pradis (Northeastern Italian Prealps) at high-temporal resolution
Source: Sci Rep. 2022 May 16;12:8104. doi: 10.1038/s41598-022-12193-6 (PMC9110381; doi:10.1038/s41598-022-12193-6)
Supplement: Supplementary file 1 — Supplementary Information 1. [file 41598_2022_12193_MOESM1_ESM.xlsx]

## Sheet: Pradis Sr isotopes
Supplementary dataset S1. Time-resolved Sr isotope data of Pradis 1 tooth enamel.
day (rel. birth)	87Sr/86Sr	84Sr/86Sr	85Rb/86Sr	87Sr/86Sr (LOWESS smoothed)	2 SE (LOWESS)
-12.6538	0.708805	0.0581129	0.0100241	0.708956	0.000189323
-11.8843	0.708899	0.058296	0.00939488	0.709012	0.000170901
-11.0878	0.709128	0.0582182	0.00916843	0.70907	0.000153766
-10.2643	0.709177	0.0582792	0.00887194	0.709127	0.000138289
-9.41349	0.709043	0.0582202	0.00891341	0.709186	0.000124822
-8.53542	0.709371	0.0582499	0.0086663	0.709245	0.000113648
-7.62987	0.709428	0.0582469	0.00871969	0.709304	0.000105041
-6.69668	0.709364	0.0582774	0.00882411	0.709363	9.92063e-05
-5.7357	0.709901	0.0579932	0.0087254	0.709423	9.61444e-05
-4.74676	0.70946	0.0581996	0.008731	0.709482	9.54478e-05
-3.72969	0.709357	0.0581582	0.00879604	0.709542	9.64669e-05
-2.68435	0.709894	0.0581944	0.00876774	0.709601	9.86817e-05
-1.61056	0.709604	0.0580866	0.0087619	0.70966	0.000101644
-0.508198	0.709331	0.0578958	0.00886832	0.709718	0.000104975
0.622883	0.709659	0.0581136	0.00884159	0.709774	0.000107811
1.78281	0.709661	0.0581134	0.00888242	0.709829	0.000109923
2.97172	0.70998	0.0581734	0.00902744	0.709882	0.000111771
4.18974	0.709911	0.0580271	0.0089347	0.709934	0.000113098
5.437	0.710044	0.0580756	0.00893868	0.709989	0.000112505
6.71362	0.709989	0.0581843	0.00932237	0.710048	0.000111622
8.01974	0.709869	0.0579892	0.00927248	0.710106	0.000113461
9.35545	0.710371	0.0580738	0.00924981	0.710158	0.000117755
10.7209	0.710101	0.0580866	0.00938477	0.710198	0.000120414
12.1161	0.710122	0.0583074	0.00944811	0.710226	0.000118305
13.5413	0.710474	0.0579952	0.0100149	0.710248	0.00011627
14.9964	0.710423	0.0579953	0.0105944	0.710263	0.000117843
16.4816	0.710733	0.0580914	0.0108413	0.710271	0.000119899
17.997	0.710269	0.0580264	0.0111547	0.710263	0.000117935
19.5425	0.71005	0.0581172	0.0116367	0.710238	0.000116302
21.1183	0.710067	0.0581081	0.0117383	0.710206	0.00011836
22.7244	0.710079	0.0581358	0.0118686	0.710179	0.000120653
24.3608	0.709917	0.0580963	0.0121779	0.710146	0.000118536
26.0274	0.710161	0.0582588	0.0123732	0.710094	0.000116566
27.7242	0.710094	0.0581341	0.0125336	0.710039	0.000118302
29.4511	0.709771	0.0582701	0.0124348	0.709996	0.000120454
31.2081	0.710012	0.0580309	0.012518	0.709962	0.000118255
32.995	0.710036	0.0580162	0.0126991	0.709921	0.000114944
34.8118	0.709876	0.0579869	0.0130858	0.709879	0.000114543
36.6583	0.709823	0.058035	0.0133025	0.709841	0.000117405
38.5344	0.709922	0.0581591	0.0132651	0.709815	0.000119582
40.4398	0.709657	0.0580549	0.0134599	0.709799	0.000117485
42.3743	0.709699	0.0579435	0.0136219	0.709788	0.000115454
44.3378	0.709858	0.0581116	0.0135823	0.709782	0.000116952
46.33	0.709663	0.0578183	0.0136515	0.709779	0.000118918
48.3506	0.709872	0.0579988	0.01359	0.709785	0.000116915
50.3993	0.709635	0.0580732	0.013737	0.709802	0.000115044
52.4759	0.709794	0.0581017	0.0136324	0.709821	0.000116581
54.5801	0.710083	0.057973	0.0135296	0.709835	0.000118476
56.7116	0.709637	0.0579952	0.0135573	0.709849	0.00011654
58.8701	0.709762	0.0580957	0.0135806	0.70987	0.000114824
61.0556	0.709965	0.0580706	0.0135306	0.709892	0.000116381
63.268	0.710243	0.0578402	0.0136942	0.709908	0.000118201
65.5077	0.70982	0.0578584	0.0137611	0.709919	0.00011623
67.7754	0.710044	0.0577735	0.0137925	0.709933	0.00011361
70.073	0.710026	0.0578758	0.0140111	0.709947	0.000113853
72.4035	0.70997	0.0578579	0.0141521	0.70996	0.000117011
74.772	0.71011	0.0578686	0.0141415	0.709971	0.000119357
77.1862	0.709738	0.0578871	0.0142913	0.70998	0.000117858
79.6551	0.709767	0.0580334	0.0140552	0.70999	0.000116623
82.1851	0.710022	0.057956	0.0140866	0.709999	0.000118779
84.9431	0.709811	0.0580184	0.0145253	0.710003	0.000121408
88.0345	0.71027	0.0579356	0.0146921	0.710004	0.00011888
91.1636	0.709884	0.0578961	0.0149331	0.710003	0.000116842
94.291	0.710091	0.0579485	0.0150205	0.709997	0.000119525
97.1334	0.710204	0.0579189	0.0149208	0.709985	0.000121889
99.9143	0.709875	0.0580276	0.0149107	0.709965	0.000119734
102.737	0.709913	0.0578199	0.0150555	0.70994	0.000117467
105.604	0.709771	0.0579151	0.0148746	0.709911	0.000118722
108.765	0.710464	0.0577858	0.0146467	0.709881	0.000120814
111.912	0.709919	0.057796	0.0145011	0.709847	0.000118085
115.019	0.709564	0.0578522	0.0145779	0.709803	0.000114424
118.048	0.70958	0.0578823	0.0145047	0.709757	0.000114188
121.056	0.709314	0.0578777	0.0144745	0.709714	0.000117177
124.122	0.709688	0.0577612	0.0141888	0.709678	0.000119379
127.23	0.709741	0.0577956	0.0144341	0.709648	0.000117156
130.361	0.709885	0.0577379	0.0141744	0.709616	0.000115018
133.435	0.709451	0.0575996	0.0139977	0.709587	0.000116393
136.475	0.709545	0.057863	0.0138144	0.709561	0.000118143
139.487	0.709555	0.0577644	0.0136586	0.709546	0.000116196
142.606	0.709569	0.0577354	0.0130669	0.709538	0.000114514
145.768	0.709372	0.0578858	0.0130715	0.709532	0.000116586
148.905	0.709533	0.0576919	0.0128828	0.70952	0.000118961
152.01	0.709705	0.0576769	0.0126195	0.709503	0.000117256
155.018	0.709414	0.0576531	0.012558	0.709489	0.000115944
158.14	0.709611	0.0577623	0.0123621	0.709474	0.000118062
161.297	0.709313	0.0577586	0.0120406	0.709455	0.000120331
164.496	0.709209	0.0574804	0.0120722	0.709429	0.000117849
167.737	0.709444	0.0577092	0.0116676	0.709398	0.000114024
171.012	0.709776	0.0577163	0.0114826	0.709365	0.000113439
174.288	0.7095	0.0576141	0.0113377	0.709334	0.000116379
177.514	0.709143	0.0575987	0.0111886	0.709309	0.000118407
180.651	0.70914	0.0576261	0.0106911	0.709284	0.000115884
183.51	0.709426	0.0577021	0.0106694	0.709257	0.000113856
186.237	0.709122	0.0576881	0.0106665	0.709233	0.000114767
188.924	0.709154	0.0575832	0.0106107	0.709218	0.00011597
191.632	0.709076	0.0576854	0.010457	0.709208	0.000114215
194.388	0.70919	0.0576349	0.0102287	0.709198	0.000112501
197.195	0.709327	0.0576779	0.010119	0.709191	0.000113587
200.048	0.709081	0.0577068	0.0100585	0.709189	0.000115196
202.943	0.709364	0.0577209	0.0101535	0.709195	0.000113761
205.872	0.709022	0.0575665	0.0100965	0.709208	0.000112909
208.832	0.709117	0.0575901	0.010225	0.709224	0.000115321
211.819	0.709031	0.0577517	0.0101316	0.709242	0.000117729
214.83	0.70961	0.0577453	0.0101148	0.709266	0.000115933
217.864	0.709581	0.0578967	0.010148	0.7093	0.000113152
220.919	0.709249	0.0575713	0.00991832	0.709339	0.000113078
223.994	0.709171	0.0577382	0.0100747	0.709377	0.000115866
227.087	0.709398	0.0576553	0.0099518	0.709408	0.000117877
230.199	0.709312	0.0578458	0.00990565	0.709438	0.000115936
233.329	0.709585	0.0577938	0.00965782	0.709472	0.000114255
236.476	0.70954	0.0577358	0.00945247	0.709505	0.000115971
239.64	0.709632	0.0579476	0.00954107	0.709533	0.000117941
242.821	0.709419	0.0580844	0.00946661	0.709556	0.000115986
246.02	0.709752	0.0578153	0.0092475	0.709578	0.000114291
249.236	0.709584	0.0578131	0.0091164	0.709598	0.000115995
252.469	0.709666	0.0577382	0.00913196	0.709619	0.000117969
255.72	0.709828	0.0578124	0.00883271	0.709641	0.000116021
258.989	0.709332	0.0578373	0.00906567	0.709663	0.000114294
262.276	0.709924	0.0580342	0.00889537	0.709684	0.000115942
265.581	0.709698	0.0579904	0.00881318	0.709703	0.000117891
268.905	0.709399	0.0579604	0.00873998	0.709722	0.000116138
272.248	0.709574	0.0581644	0.0087103	0.709743	0.000113266
275.61	0.709745	0.0579707	0.0083942	0.709762	0.000111991
278.993	0.709878	0.0581678	0.00815477	0.709777	0.000112504
282.395	0.709884	0.0581705	0.00803712	0.709785	0.000112419
285.817	0.710175	0.0581723	0.00807791	0.709788	0.000110777
289.261	0.709555	0.0582165	0.0080671	0.709789	0.000108917
292.725	0.709906	0.058248	0.00822968	0.709786	0.000106981
296.211	0.709564	0.058193	0.00758673	0.709781	0.000105011
299.718	0.709874	0.0580942	0.00774644	0.709772	0.00010406
303.248	0.710198	0.0581764	0.00783093	0.709762	0.000105806
306.8	0.709578	0.0583199	0.00767639	0.709748	0.000111447
310.375	0.70987	0.0582036	0.00729713	0.70973	0.000122063
313.973	0.709608	0.0582477	0.00788135	0.709708	0.000138429
317.594	0.709432	0.0583429	0.00747615	0.709682	0.000160877
321.24	0.709176	0.0583345	0.00775713	0.709652	0.000189219
324.909	0.710108	0.0584866	0.00729324	0.709619	0.000222964
